# Supplementary material for: A novel metabolism-related gene signature in patients with hepatocellular carcinoma
Source: PeerJ. 2023 Nov 9;11:e16335. doi: 10.7717/peerj.16335 (PMC10640845; doi:10.7717/peerj.16335)
Supplement: Supplemental Information 2 [file peerj-11-16335-s002.xlsx]

## Sheet: Sheet1
		CT
siNC	GOT2	26.08
		26
		26.16
	GAPDH	14.61
		14.67
		14.75
si-1	GOT2	29.44
		29.95
		29.93
	GAPDH	15.96
		15
		15
si-2	GOT2	29.12
		28
		28.5
	GAPDH	14.47
		14.64
		14.32
si-3	GOT2	29.65
		28.4
		28.3
	GAPDH	14.64
		14.47
		14.19
