# Supplementary material for: A novel metabolism-related gene signature in patients with hepatocellular carcinoma
Source: PeerJ. 2023 Nov 9;11:e16335. doi: 10.7717/peerj.16335 (PMC10640845; doi:10.7717/peerj.16335)
Supplement: Supplemental Information 4 [file peerj-11-16335-s004.xlsx]

## Sheet: Sheet1
Huh7	The width of scratch
	1.52 1.72 1.70 1.71
	1.25 0.96 1.09 1.07
97H	The width of scratch
	1.63 1.94 2.15 1.84
	1.43 1.08 1.59 1.29
siNC-1	1.211
2	0.554
3	0.242
Si-1-1	1.012
2	0.524
3	0.345
Si-2-1	0.98
2	0.59
3	0.599
Si-3-1	1.003
2	0.614
3	0.466
